# Supplementary material for: Adverse effects of maternal lead levels on birth outcomes in the ALSPAC study: a prospective birth cohort study
Source: PubMed Central journal article supplement (PMC4322474; doi:10.1111/1471-0528.12756), 2014-05-14
Supplement: bjo0122-0322-sd1.pdf [file bjo0122-0322-sd1.pdf]

**Supplementary Table S1** Linear multiple regression: log<sub>10</sub> B-Pb (μg/dl) as predictor of birth outcomes

|                           | <b>R<sup>2</sup> (%)</b> | <b>B (SE)</b>   | <b>95% CI for B</b> | <b>p value</b> |
|---------------------------|--------------------------|-----------------|---------------------|----------------|
| Birth weight (g)          |                          |                 |                     |                |
| Univariate                | 0.6                      | -274.18 (31.21) | -383.92 to -164.44  | <0.001         |
| Multivariate <sup>a</sup> | 38.7                     | -120.19 (48.37) | -215.02 to -25.36   | 0.013          |
| Head circumference (cm)   |                          |                 |                     |                |
| Univariate                | 0.2                      | -0.48 (0.16)    | -0.80 to -0.16      | 0.003          |
| Multivariate <sup>a</sup> | 30.9                     | -0.35 (0.15)    | -0.63 to -0.06      | 0.019          |
| Crown-heel (cm)           |                          |                 |                     |                |
| Univariate                | 0.4                      | -0.95 (0.25)    | -1.47 to -0.45      | <0.001         |
| Multivariate <sup>a</sup> | 32.1                     | -0.50 (0.23)    | -0.95 to -0.05      | 0.031          |

<sup>a</sup>Adjusted for maternal height, maternal prepregnancy weight, maternal educational attainment, parity, no of cigarettes per day, sex of baby, gestational age at delivery or death.

All models overall p<0.001.

**Supplementary Table S2** Summary of studies on associations between maternal B-Pb and pregnancy outcomes

| Authors                              | Location of study           | n      | Mean maternal B-Pb ( $\mu\text{g}/\text{dl}$ )                    | Pregnancy outcome(s) studied                                                                        | Results                                                                                                | Comments                       |
|--------------------------------------|-----------------------------|--------|-------------------------------------------------------------------|-----------------------------------------------------------------------------------------------------|--------------------------------------------------------------------------------------------------------|--------------------------------|
| <b>Low exposure<sup>a</sup></b>      |                             |        |                                                                   |                                                                                                     |                                                                                                        |                                |
| Xie et al., 2013 <sup>1</sup>        | China                       | 252    | 1.00–11.91, median 3.2                                            | Birth length<br>BW<br>HC                                                                            | Association of B-Pb with BW<br>No association with HC or birth length                                  |                                |
| Vigeh et al., 2011 <sup>2</sup>      | Tehran, Iraq                | 348    | 3.8 (1.0–20.5), geometric mean 3.5                                | Preterm delivery                                                                                    | B-Pb higher in women who delivered preterm babies<br>Association of B-Pb with preterm delivery         |                                |
| Gundacker et al., 2010 <sup>3</sup>  | Vienna, Austria             | 53     | 2.5                                                               | BW<br>Birth length<br>Head circumference                                                            | Association of B-Pb with birth weight<br>No association with length of gestation or head circumference |                                |
| Vigeh et al., 2010 <sup>4</sup>      | Tehran, Iraq                | 332    | PROM: 4.61 $\pm$ 2.37 (n=36)<br>Not PROM: 3.69 $\pm$ 1.85 (n=296) | PROM                                                                                                | B-Pb higher in women who delivered babies with PROM<br>Association of B-Pb with PROM                   |                                |
| <b>High exposure<sup>b</sup></b>     |                             |        |                                                                   |                                                                                                     |                                                                                                        |                                |
| Rahman et al., 2012 <sup>5</sup>     | Kuwait                      | 194    | 5.77                                                              | BW<br>Crown–heel length<br>Head circumference<br>APGAR score<br>Gestational age<br>Placental weight | No associations with B-Pb<br>Cord B-Pb associated with APGAR score in boys only                        |                                |
| Zhu et al., 2010 <sup>6</sup>        | New York                    | 45,000 | Selected those with B-Pb <10                                      | Preterm birth<br>SGA<br>LBW                                                                         | Small risk of decreased BW with increasing B-Pb<br>No association with preterm birth or SGA            | State database                 |
| Mirghani, 2010 <sup>7</sup>          | Saudi Arabia (Aseer region) | 128    | <20 (n=86)<br>>20 (n=41)                                          | BW<br>Gestational age<br>PROM                                                                       | No associations                                                                                        |                                |
| Chen et al., 2006 <sup>8</sup>       | Taiwan                      | 1611   | 10.1 $\pm$ 10.4                                                   | SGA                                                                                                 | Association of B-Pb >20 with SGA                                                                       | Occupational exposure database |
| Rahman and Hakeem, 2003 <sup>9</sup> | Karachi, Pakistan           | 73     | 9.91 $\pm$ 4.44 (2.28–36.35)                                      | Gestational age<br>BW<br>Recumbent length<br>Head circumference                                     | No associations<br>Mothers of boys had higher B-Pb than mothers of girls                               |                                |

|                                            |                             |         |                                                                                                                                                 |                                                                                        |                                                                                                                                          |                                                                                                             |
|--------------------------------------------|-----------------------------|---------|-------------------------------------------------------------------------------------------------------------------------------------------------|----------------------------------------------------------------------------------------|------------------------------------------------------------------------------------------------------------------------------------------|-------------------------------------------------------------------------------------------------------------|
| Bjerregaard and Hansen, 2000 <sup>10</sup> | Disko Bay, Greenland        | 180     | 3.57±4.15                                                                                                                                       | BW<br>Length                                                                           | No associations                                                                                                                          | High consumption of marine meat and blubber                                                                 |
| Factor-Litvak et al., 1999 <sup>11</sup>   | Kosovo, Yugoslavia          | 401     | Exposed to smelter: 19.1±7.9<br>Not exposed: 5.6±1.9                                                                                            | Length of gestation<br>BW<br>Preterm birth                                             | No associations                                                                                                                          |                                                                                                             |
| Borja-Aburto et al., 1999 <sup>12</sup>    | Mexico City                 | 668     | Cases: 12.03<br>Controls: 10.09                                                                                                                 | Spontaneous abortion                                                                   | Increased risk of spontaneous abortion                                                                                                   |                                                                                                             |
| Gonzales-Cossio et al., 1997 <sup>13</sup> | Mexico                      | 272     | 8.9±4.1 (median 8.1)<br>Tibia and patella lead levels                                                                                           | BW                                                                                     | Association of tibia lead with BW<br>No associations for maternal B-Pb or patella lead                                                   |                                                                                                             |
| West et al., 1994 <sup>14</sup>            | USA                         | 349     | 6.36±0.19 (2.7–12.0)                                                                                                                            | Gestational age<br>LBW<br>BW                                                           | Association of gestation age with B-Pb<br>No association for BW<br>No association for LBW unless excluded women with genital infections. | African-American women                                                                                      |
| McMichael et al., 1986 <sup>15</sup>       | Port Pirie, South Australia | 749     | Smelter community: 10.6<br>Non-smelter community: 7.6                                                                                           | Preterm delivery<br>Miscarriage<br>LBW at term<br>IUGR<br>PROM<br>Congenital anomalies | Association of preterm delivery with B-Pb<br>No other associations                                                                       |                                                                                                             |
| <b>Miscellaneous<sup>c</sup></b>           |                             |         |                                                                                                                                                 |                                                                                        |                                                                                                                                          |                                                                                                             |
| Atabek et al., 2007 <sup>16</sup>          | Turkey                      | 54      | 14.4 ±0.89 (5.1–35.5) (cord blood)                                                                                                              | BW<br>Other anthropometric variable                                                    | Association of B-Pb with BW<br>No association with any other variables                                                                   |                                                                                                             |
| Berkowitz et al., 2006 <sup>17</sup>       | Idaho, USA                  | 169,878 | –                                                                                                                                               | Preterm birth<br>SGA<br>LBW<br>BW                                                      | Associations of living in accident area at time of accident with BW, SGA and BW<br>No association with preterm birth                     | Mothers living in area of smelter which had accident in 1973 resulting in high air lead levels for 6 months |
| Zentner et al., 2006 <sup>18 d</sup>       | Brazil                      | 55      | – (cord blood)                                                                                                                                  | BW<br>Length                                                                           | Associations of B-Pb with BW and length                                                                                                  |                                                                                                             |
| Wang et al., 2004 <sup>19</sup>            | China                       | 89      | Cord blood levels<br>Rural: 7.4 <sup>a</sup> (3.52–24.6)<br>Industrial:<br>6.59 <sup>a</sup> (2.0–17.2)<br>Urban: 5.43 <sup>a</sup> (2.79–18.7) | BW<br>Birth length                                                                     | No associations                                                                                                                          |                                                                                                             |

|                                      |                  |                                                                                    |                                                                                        |                                                                                                                                                         |                                                                                                                                                               |                     |
|--------------------------------------|------------------|------------------------------------------------------------------------------------|----------------------------------------------------------------------------------------|---------------------------------------------------------------------------------------------------------------------------------------------------------|---------------------------------------------------------------------------------------------------------------------------------------------------------------|---------------------|
| Falcon et al., 2003 <sup>20</sup>    | Spain            | 89                                                                                 | 113.4±58.0 mg/g dry weight (placenta lead)                                             | BW<br>Head circumference<br>Abdominal circumference<br>Length                                                                                           | No associations                                                                                                                                               |                     |
| Yao and Huang, 2003 <sup>21 d</sup>  | Beijing, China   | 1151                                                                               | 4.34                                                                                   | BW<br>Length<br>HC<br>Chest circumference<br>Abdomen circumference<br>Neurobehavioural development at 42 days<br>Pregnancy complications<br>APGAR score | No associations                                                                                                                                               |                     |
| Sowers et al., 2002 <sup>22 d</sup>  | USA              | 705                                                                                | 1.2±0.03                                                                               | BW<br>Gestational age<br>SGA                                                                                                                            | No associations                                                                                                                                               |                     |
| Durska, 2001 <sup>23 d</sup>         | Szczecin, Poland | 83                                                                                 | 1.33                                                                                   | BW<br>Length<br>HC<br>Chest circumference                                                                                                               | No associations                                                                                                                                               |                     |
| Osman et al., 2000 <sup>24</sup>     | Sweden           | 106                                                                                | 26 (0–630) nmol/kg (placenta lead)<br>54 nmol/l (cord blood; equivalent to 1.12 µg/dl) | BW<br>Head circumference<br>Length                                                                                                                      | Association of cord B-Pb with birth length, head circumference and BW                                                                                         |                     |
| Richter et al., 1999 <sup>25 d</sup> | Czech Republic   | Control group: 50<br>IUGR group: 43                                                | –                                                                                      | IUGR                                                                                                                                                    | Lower B-Pb in IUGR group                                                                                                                                      |                     |
| Irgens et al., 1998 <sup>26</sup>    | Norway           | Maternal (n=1886) or paternal (n=35,802) occupational lead exposure vs no exposure | –                                                                                      | LBW<br>Gestational age<br>Preterm birth<br>Neural tube defects and other birth defects<br>Perinatal mortality<br>Down's syndrome                        | Increased risk of LBW and neural tube defects in occupationally exposed mothers<br>Decreased risk of LBW and preterm birth for occupationally exposed fathers |                     |
| Phillion et al., 1997 <sup>27</sup>  | Canada           | 9329                                                                               | Living in smelter city vs not                                                          | SGA                                                                                                                                                     | No association of exposure on SGA                                                                                                                             | Birth records 1961– |

|                                      |               |                                           |                                           |                                  |                                                                                 | 1990 |
|--------------------------------------|---------------|-------------------------------------------|-------------------------------------------|----------------------------------|---------------------------------------------------------------------------------|------|
| Fagher et al., 1993 <sup>28 d</sup>  | Sweden/Poland | Preterm delivery: 17<br>Term delivery: 13 | Polish women: 3.79<br>Swedish women: 1.12 | Preterm delivery                 | No effect of lead causing increase in myometrial activity                       |      |
| Bellinger et al., 1991 <sup>29</sup> | Australia     | 4354                                      | 7.0±3.3 (cord blood)                      | Length of gestation<br>BW<br>SGA | No adverse effects on fetal growth at levels <15, but may be modest effects >15 |      |

Adapted with permission from Taylor et al. (2014).<sup>30</sup>

<sup>a</sup>Mean or median maternal B-Pb <5 µg/dl; <sup>b</sup>mean or median maternal B-Pb ≥5 µg/dl.

<sup>c</sup>Categorised as miscellaneous because: (1) measurement of lead in tissue other than maternal blood; (2) measure of lead level not reported; (3) abstract only retrieved.

<sup>d</sup>Abstract only retrieved.

B-Pb, blood lead level; BW, birth weight; IUGR, intrauterine growth retardation; LBW, low birth weight; PROM, premature rupture of the membranes; SGA, small for gestational age.

## References

1. Xie X, Ding G, Cui C, Chen L, Gao Y, Zhou Y, et al. The effects of low-level prenatal lead exposure on birth outcomes. *Environ Pollut.* 2013;175:30-34
2. Vigh M, Yokoyama K, Seyedaghamiri Z, Shinohara A, Matsukawa T, Chiba M, et al. Blood lead at currently acceptable levels may cause preterm labour. *Occup Environ Med.* 2011;68:231-234
3. Gundacker C, Frohlich S, Graf-Rohrmeister K, Eibenberger B, Jessenig V, Gicic D, et al. Perinatal lead and mercury exposure in Austria. *Sci Total Environ.* 2010;408:5744-5749
4. Vigh M, Yokoyama K, Shinohara A, Afshinrokh M, Yunesian M. Early pregnancy blood lead levels and the risk of premature rupture of the membranes. *Reprod Toxicol.* 2010;30:477-480
5. Rahman A, Al-Rashidi HA, Khan AR. Association of maternal blood lead level during pregnancy with child blood lead level and pregnancy outcome in Kuwait. *Ecol Food Nutr.* 2012;51:40-57
6. Zhu M, Fitzgerald EF, Gelberg KH, Lin S, Druschel CM. Maternal low-level lead exposure and fetal growth. *Environ Health Persp.* 2010;118:1471-1475

7. Mirghani Z. Effect of low lead exposure on gestational age, birth weight and premature rupture of the membrane. *J Pakistan Med Assoc.* 2010;60:1027-1030
8. Chen PC, Pan IJ, Wang JD. Parental exposure to lead and small for gestational age births. *Am J Industr Med.* 2006;49:417-422
9. Rahman A, Hakeem A. Blood lead levels during pregnancy and pregnancy outcome in Karachi women. *J Pakistan Med Assoc.* 2003;53:529-533
10. Bjerregaard P, Hansen JC. Organochlorines and heavy metals in pregnant women from the Disko Bay area in Greenland. *Sci Total Environ.* 2000;245:195-202
11. Factor-Litvak P, Graziano JH, Kline JK, Popovac D, Mehmeti A, Ahmedi G, et al. A prospective study of birthweight and length of gestation in a population surrounding a lead smelter in Kosovo, Yugoslavia. *Int J Epidemiol.* 1991;20:722-728
12. Borja-Aburto VH, Hertz-Picciotto I, Rojas Lopez M, Farias P, Rios C, Blanco J. Blood lead levels measured prospectively and risk of spontaneous abortion. *Am J Epidemiol.* 1999;150:590-597
13. Gonzalez-Cossio T, Peterson KE, Sanin LH, Fishbein E, Palazuelos E, Aro A, et al. Decrease in birth weight in relation to maternal bone-lead burden. *Pediatrics.* 1997;100:856-862
14. West WL, Knight EM, Edwards CH, Manning M, Spurlock B, James H, et al. Maternal low level lead and pregnancy outcomes. *J Nutr.* 1994;124:981S-986S
15. McMichael AJ, Vimpani GV, Robertson EF, Baghurst PA, Clark PD. The port pirie cohort study: Maternal blood lead and pregnancy outcome. *J Epidemiol Commun Health* 1986;40:18-25
16. Atabek ME, Kurtoglu S, Pirgon O, Uzum K, Saraymen R. Relation of in utero lead exposure with insulin-like growth factor-i levels and neonatal anthropometric parameters. *Int J Hyg Environ Health.* 2007;210:91-95
17. Berkowitz Z, Price-Green P, Bove FJ, Kaye WE. Lead exposure and birth outcomes in five communities in Shoshone county, Idaho. *Int J Hyg Environ Health* 2006;209:123-132
18. Zentner LE, Rondo PH, Mastroeni SS. Lead contamination and anthropometry of the newborn baby. *J Trop Pediatr.* 2006;52:369-371.
19. Wang C, Huang L, Zhou X, Xu G, Shi Q. Blood lead levels of both mothers and their newborn infants in the middle part of China. *Int J Hyg Environ Health.* 2004;207:431-436
20. Falcon M, Vinas P, Luna A. Placental lead and outcome of pregnancy. *Toxicology.* 2003;185:59-66
21. Yao HY, Huang XH. The blood lead level and pregnant outcome in pregnant women with non-occupational lead exposure. *Chinese J Obstetr Gynaecol.* 2003;38:340-342
22. Sowers M, Jannausch M, Scholl T, Li W, Kemp FW, Bogden JD. Blood lead concentrations and pregnancy outcomes. *Arch Environ Health.* 2002;57:489-495
23. Durska G. [Levels of lead and cadmium in pregnant women and newborns and evaluation of their impact on child development]. *Annales Academiae Medicae Stetinensis.* 2001;47:49-60
24. Osman K, Akesson A, Berglund M, Bremme K, Schutz A, Ask K, et al. Toxic and essential elements in placentas of Swedish women. *Clin Biochem.* 2000;33:131-138
25. Richter J, Hájek Z, Pfeifer I, Šubrt P. Relation between concentration of lead, zinc and lysozyme in placentas of women with intrauterine foetal growth retardation. *Cent Eur Public Health.* 1999;7:40-42

26. Irgens A, Kruger K, Skorve AH, Irgens LM. Reproductive outcome in offspring of parents occupationally exposed to lead in Norway. *Am J Industr Med.* 1998;34:431-437
27. Philion JJ, Schmitt N, Rowe J, Gelpke PM. Effect of lead on fetal growth in a Canadian smelter city, 1961-1990. *Arch Environ Health.* 1997;52:472-475
28. Fagher U, Laudanski T, Schutz A, Sipowicz M, Akerlund M. The relationship between cadmium and lead burdens and preterm labor. *Int J Gynaecol Obstetr.* 1993;40:109-114
29. Bellinger D, Leviton A, Rabinowitz M, Allred E, Needleman H, Schoenbaum S. Weight gain and maturity in fetuses exposed to low levels of lead. *Environ Res.* 1991;54:151-158
30. Taylor CM, Golding J, Emond AE. Lead, cadmium and mercury levels in pregnancy: the need for international consensus on levels of concern. *J Dev Origins Health Dis.* 2014;5:16-30.
